# Supplementary material
Source: PubMed Central journal article supplement (PMC3547600)

## Supplemental Figure 1.

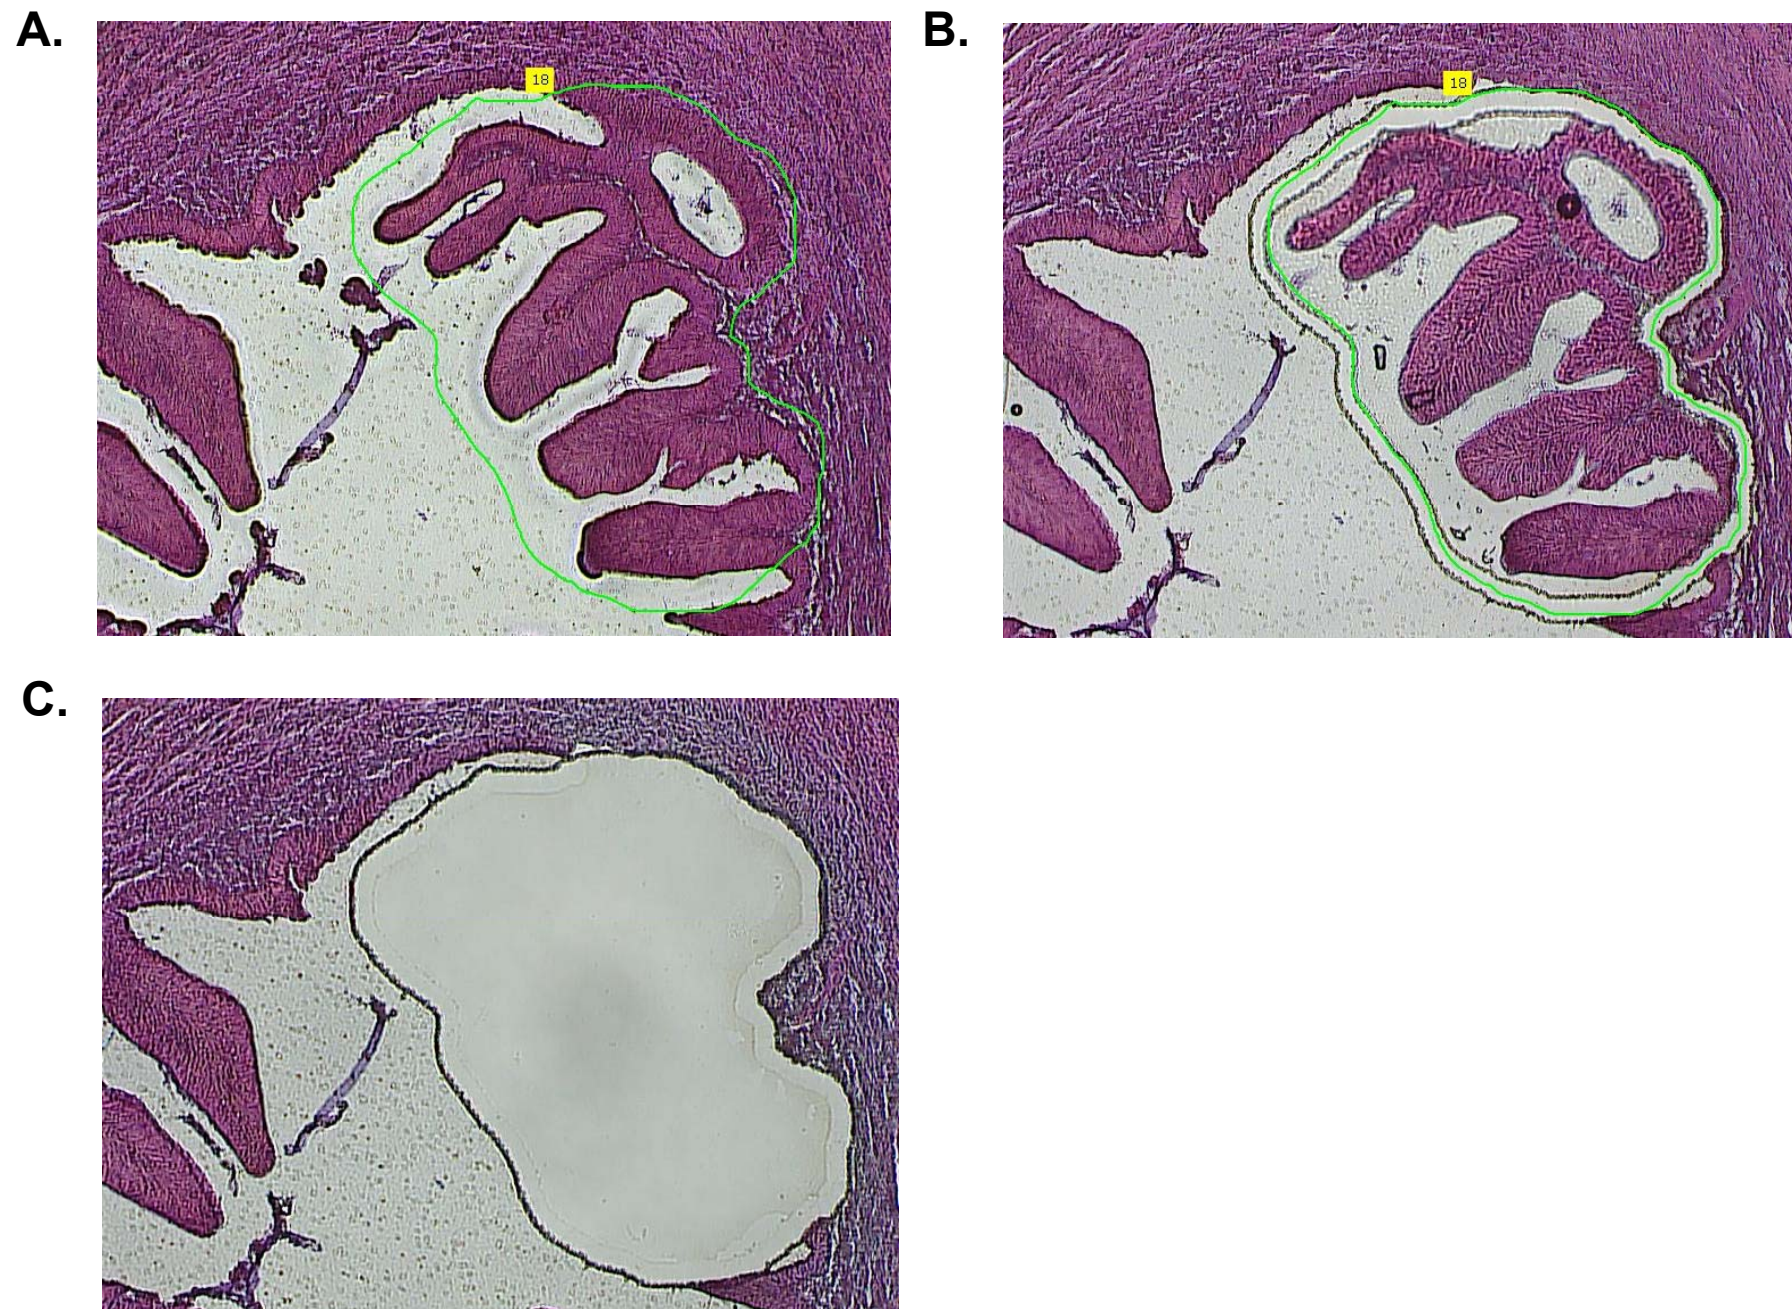

## Supplemental Figure 2.

### FFPE Tissue Study (FTS)

#### FTS1. miRNA Identification and Verification in 22 specimens: LG IPMN (10), HG IPMN (12)

- Specimen Microdissection
- Total RNA Extraction
- HT miRNA Expression Analysis (TaqMan<sup>®</sup> MicroRNA Arrays)<sup>1</sup>
- Identification of miRNA candidates using bioinformatics<sup>1</sup> → 26 *tissue* miRNAs
- RT-qPCR verification of *tissue* miRNAs (singleplex TaqMan RT-qPCR)<sup>1</sup>

#### FTS2. Independent miRNA Validation in 33 specimens: LG IPMN (6), HG IPMN (14), HG IPMN w/cancer (13).

- Specimen Microdissection
- Total RNA Extraction
- RT-qPCR validation of *tissue* miRNAs from FTS1 using singleplex TaqMan RT-qPCR<sup>1</sup>
- Identification of miRNA candidates by bioinformatics using 23 specimens → 13 “verified” *tissue* miRNAs<sup>2</sup>

### Cystic Fluid Study (CFS)

#### CFS1. miRNA Identification and Verification in 15 specimens: SCA (5), LG IPMN (5), HG IPMN (5)

- Total RNA Extraction
- HT miRNA Expression Analysis (TaqMan MicroRNA Arrays)<sup>1</sup>
- Identification of miRNA candidates by bioinformatics using 11 specimens<sup>2</sup> → 37 *cyst fluid* miRNAs, containing top 13 miRNAs from 26 *tissue* miRNAs (FTS1.d)
- RT-qPCR verification of *cyst fluid* miRNAs by singleplex TaqMan RT-qPCR → 18 “verified” *cyst fluid* miRNAs<sup>2</sup>

#### CFS2. Independent miRNA Validation in 50 specimens: LG IPMN (2), IG IPMN (12), HG IPMN (5), HG IPMN w/cancer (1), SCA (20), NET (5), SPN (5)

- Total RNA Extraction
- RT-qPCR validation of 18 “verified” *cyst fluid* miRNAs + miR-21 by singleplex TaqMan RT-qPCR using 49 specimens<sup>2</sup>
- Logistic regression model: combined specimens from CFS1 (9) + CFS2 (12) for training set, and CFS2 (37) for test set → 9 miRNA model<sup>2</sup>

Supplemental Figure 3.

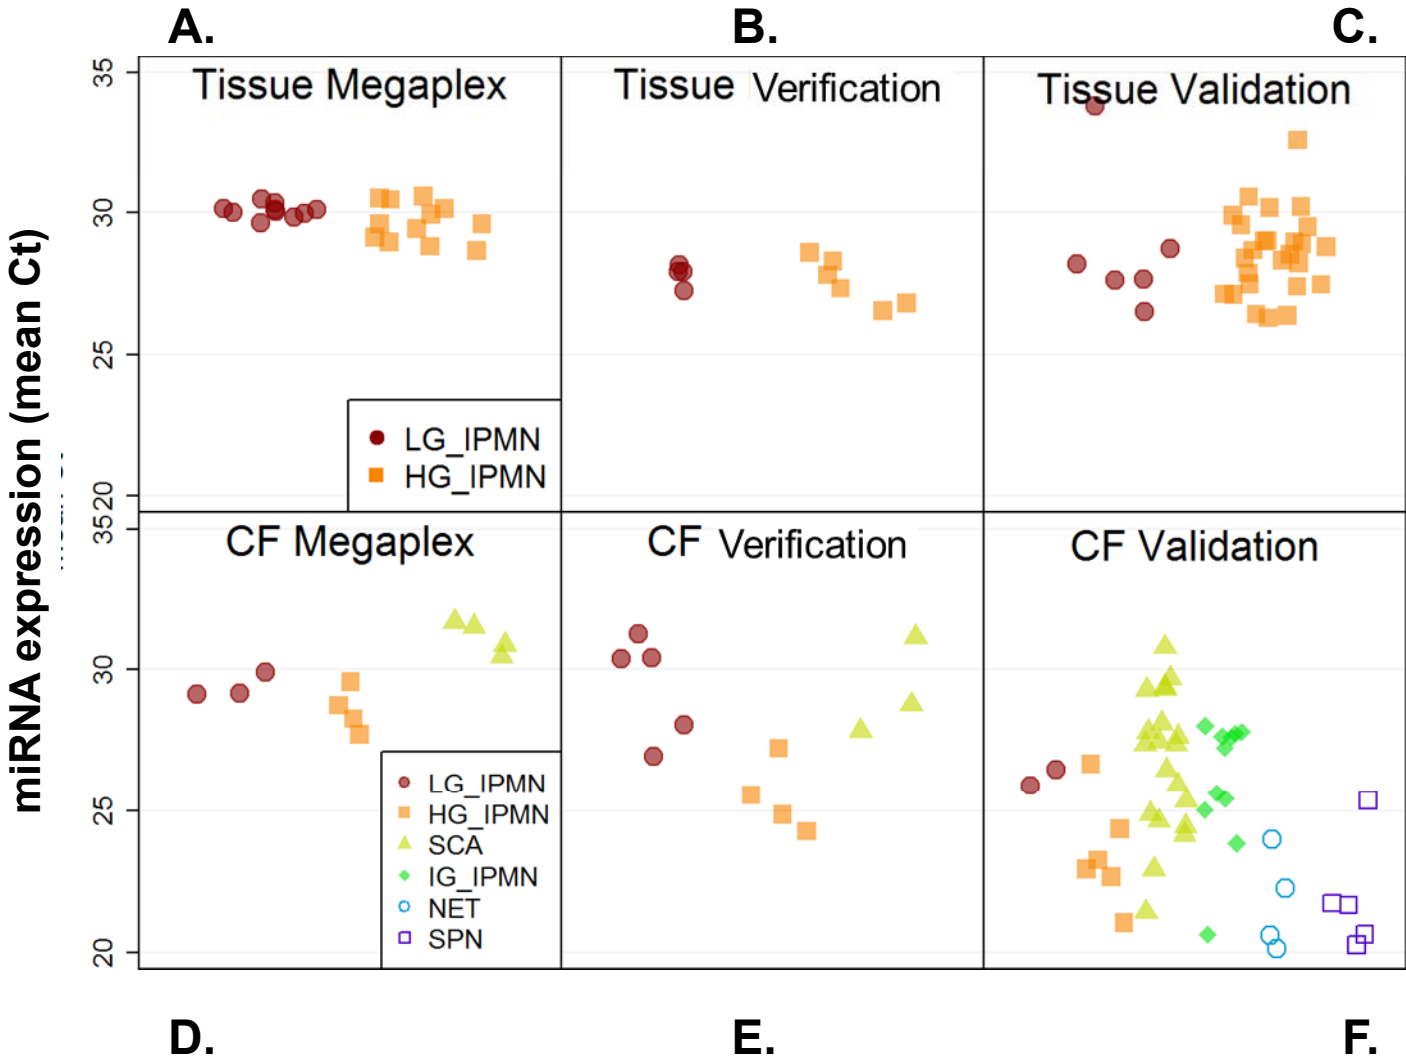

# Supplemental Figure 4.

**A.**

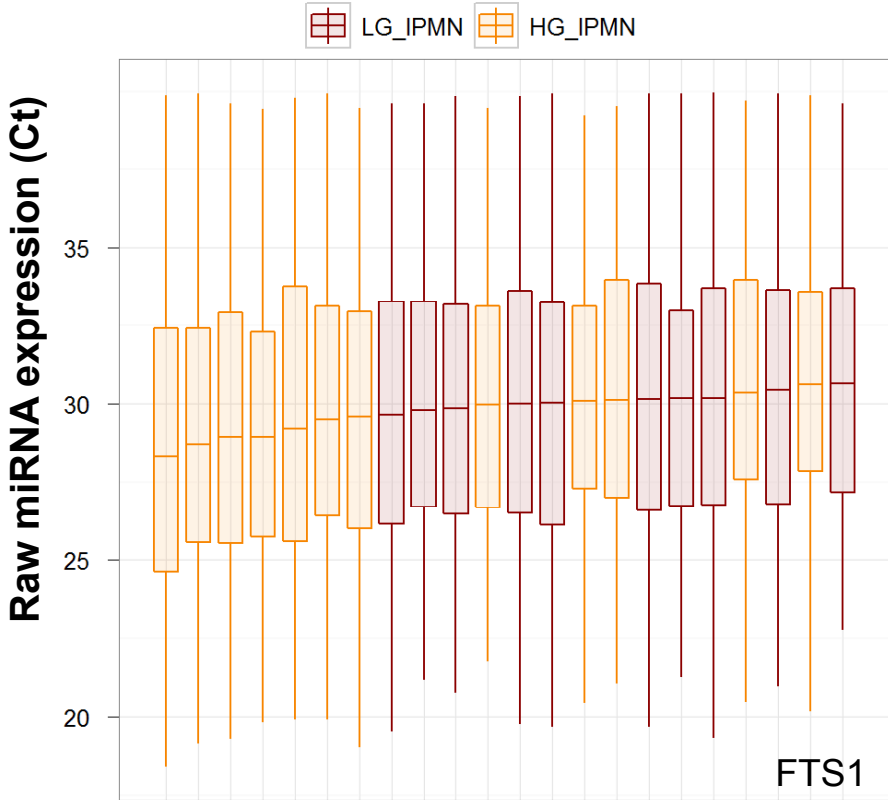

**B.**

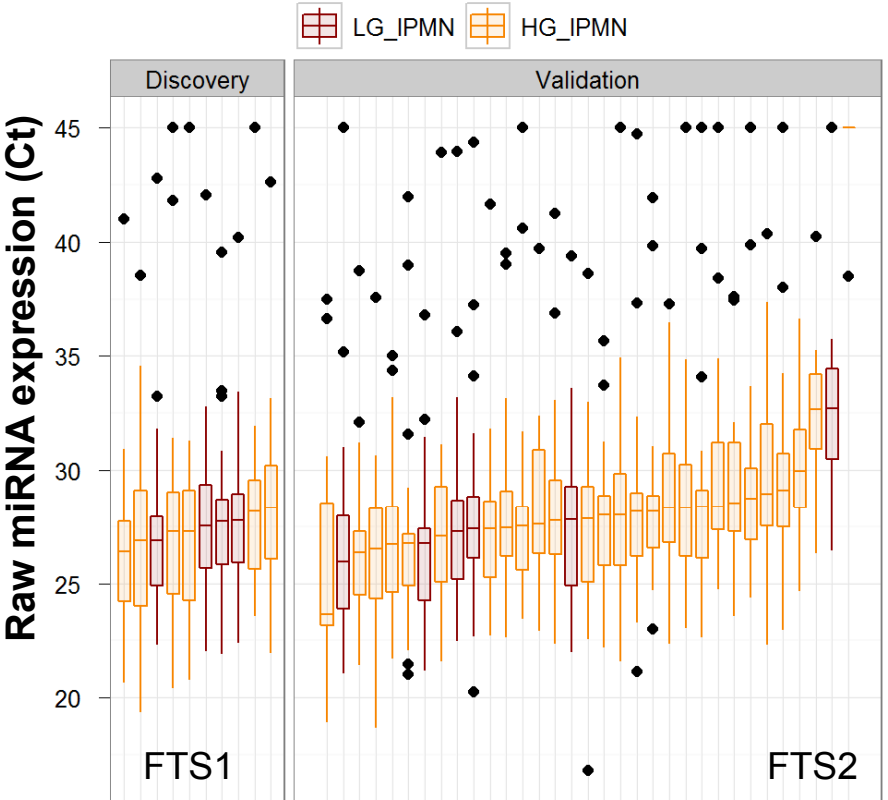

Supplemental Figure 5.

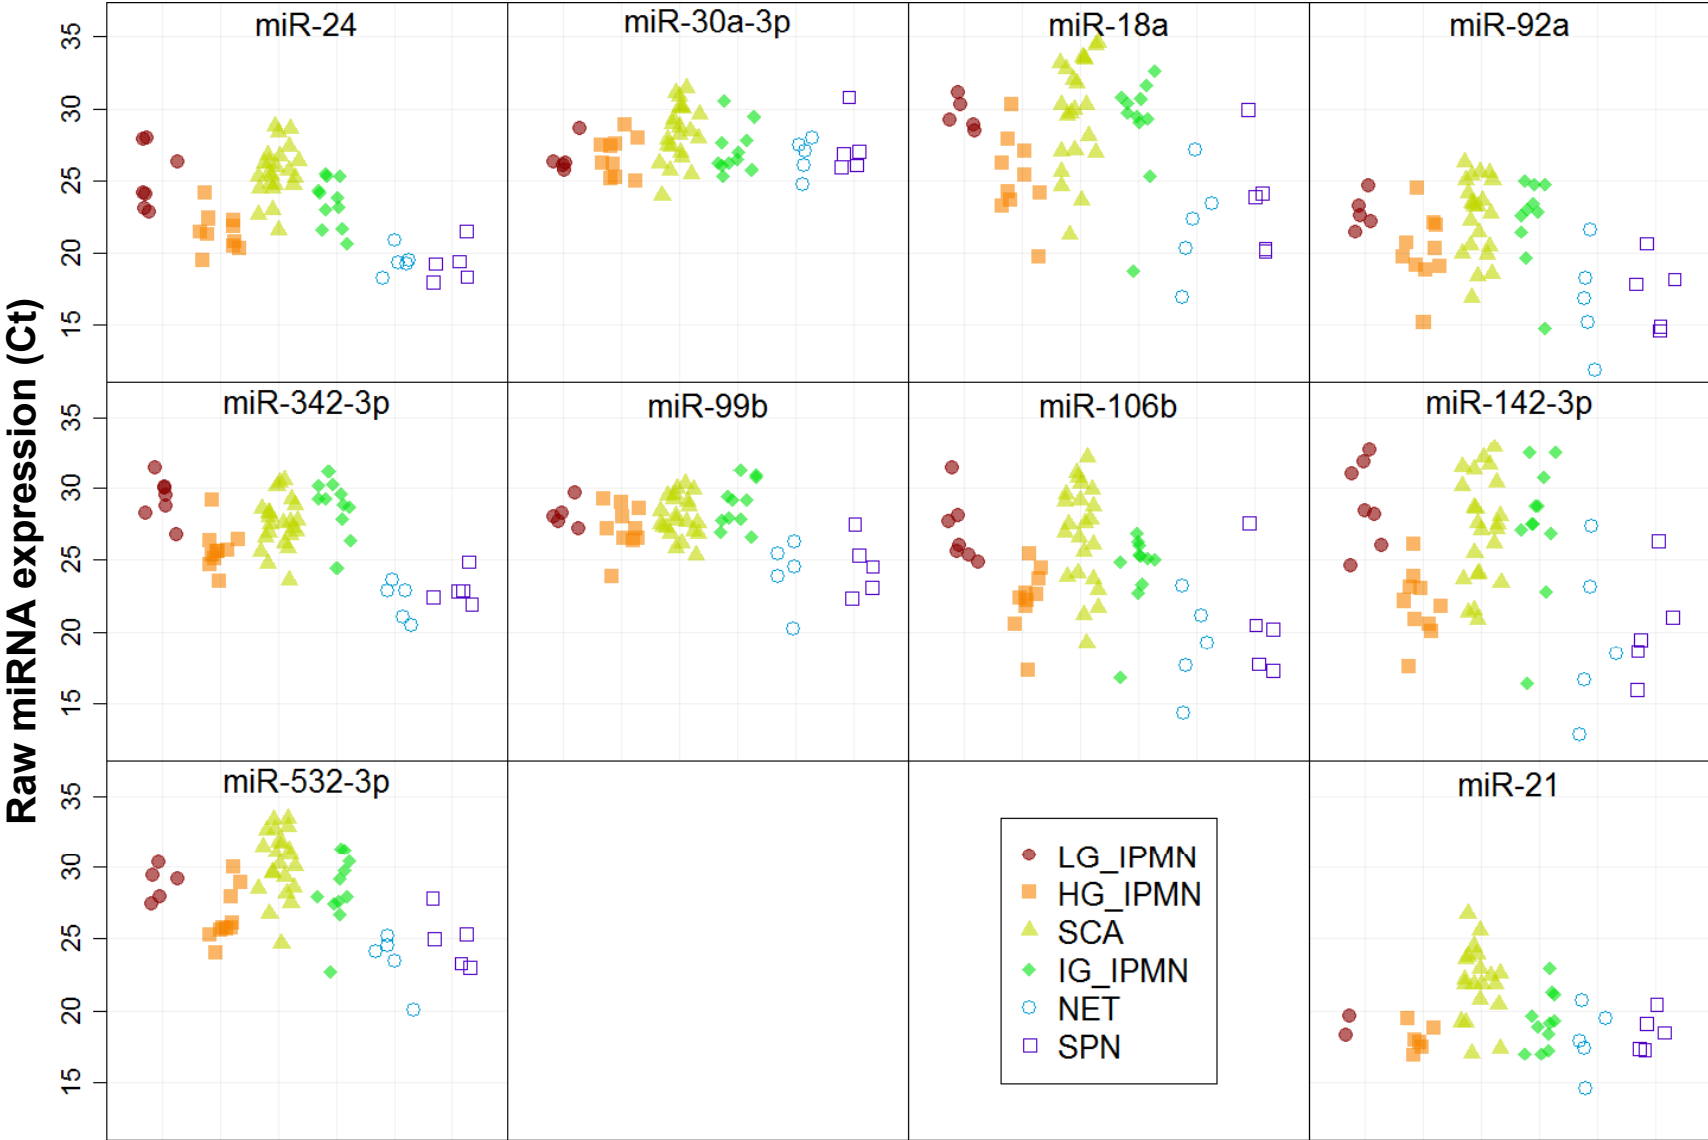

# Supplemental Figure 6.

A.

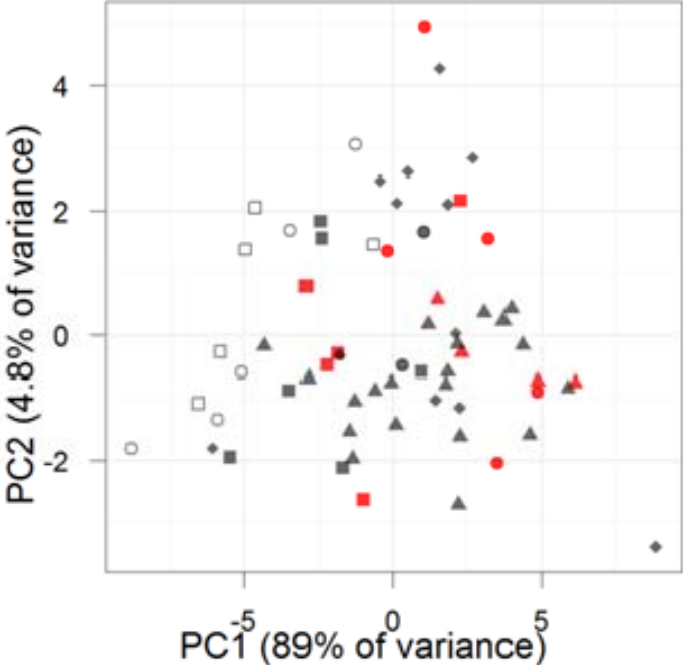

B.

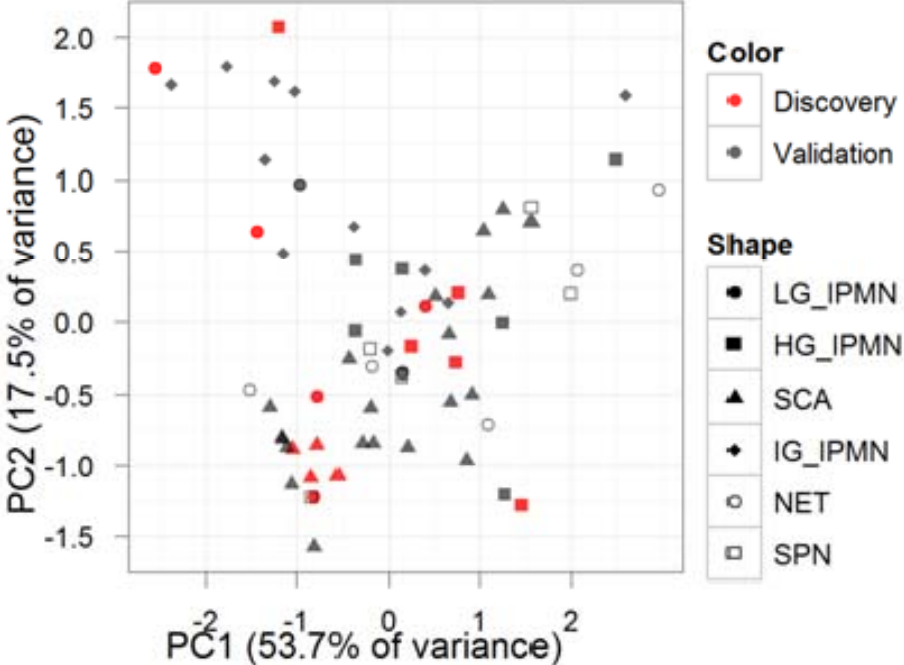

# Supplemental Figure 7.

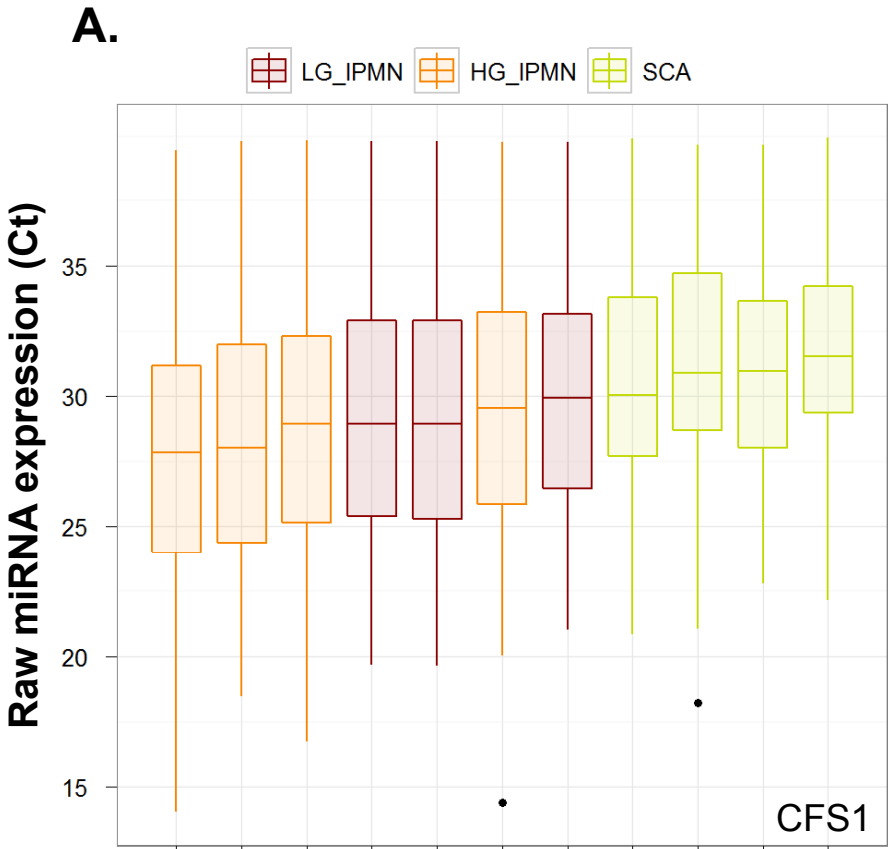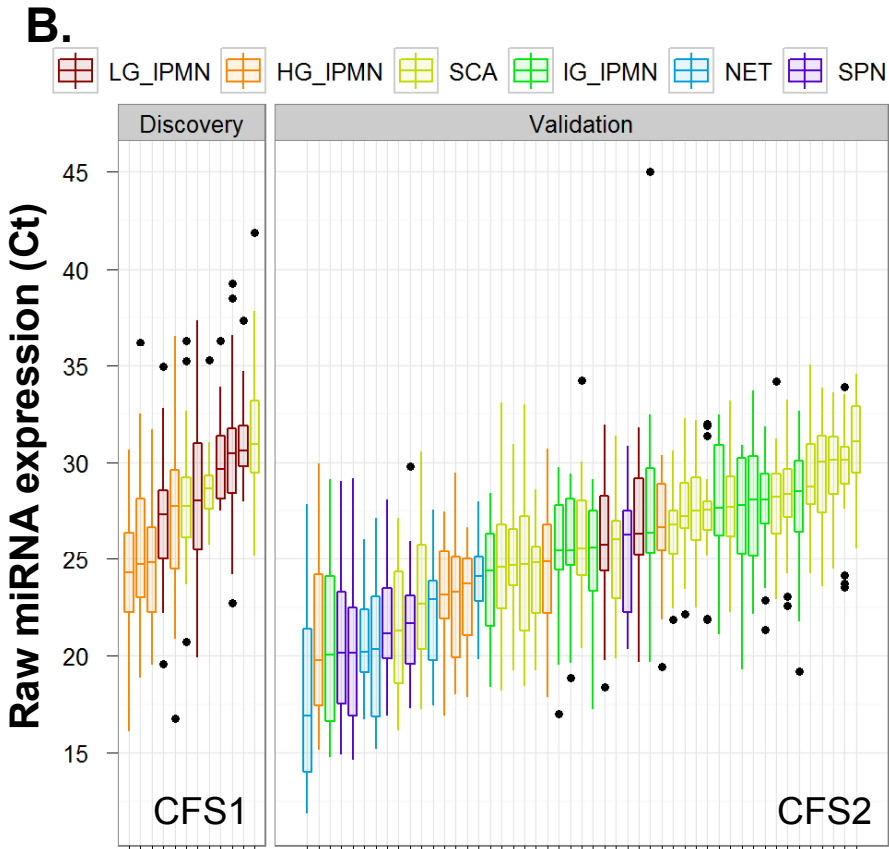

# Supplemental Figure 8.

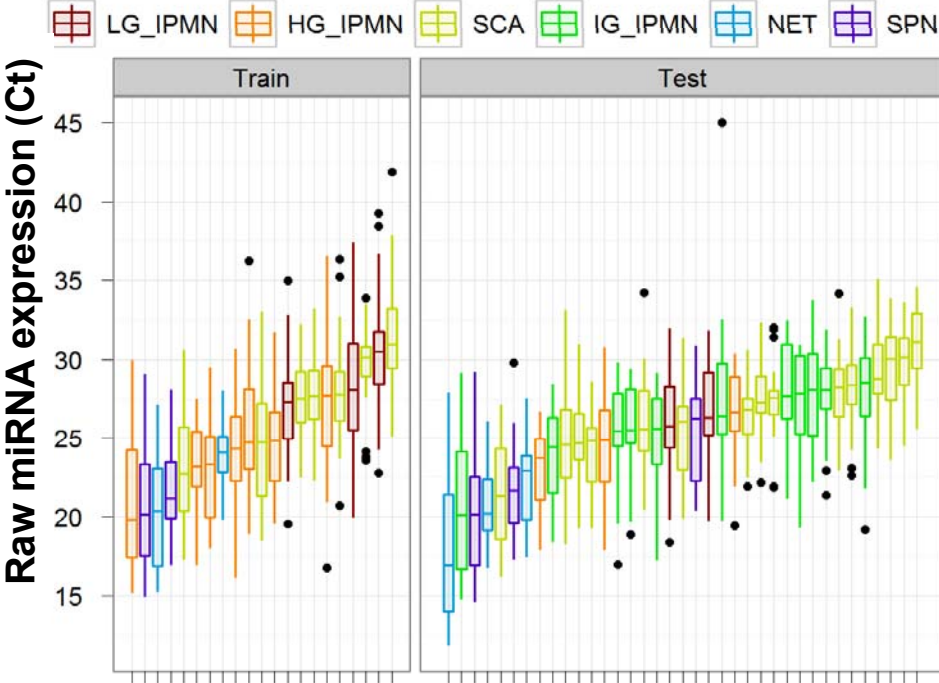

Supplement: NIHMS429337-supplement-figures.pdf [file NIHMS429337-supplement-figures.pdf]
